# Supplementary material
Source: MDPI journal article supplement (https://www.mdpi.com/2073-4441/12/9/2608)
Supplement: s1 [file s1]

# Supplementary Materials: Trust in drinking water quality: understanding the role of risk perception and transparency

Table S1: Test results between customer characteristics and the degree of concern about quality and safety.

|                                       | Concern about quality and safety |        | Test             |
|---------------------------------------|----------------------------------|--------|------------------|
|                                       | U, rho or $\chi^2$               | p      |                  |
| Gender                                | U = 127788                       | 0,31   | Mann-Whitney     |
| Age                                   | rho = 0,05                       | 0,11   | Spearman         |
| Level of education                    | rho = -0,05                      | 0,10   | Spearman         |
| Pregnant/children*                    | U = 114876                       | <0,01  | Mann-Whitney     |
| Pregnant/children under the age of 13 | U = 72188                        | 0,06   | Mann-Whitney     |
| Chronical disease                     | U = 88297                        | 0,31   | Mann-Whitney     |
| Customer perspective *                | $\chi^2 = 120$                   | <0,001 | Chi <sup>2</sup> |
| Source *                              | $\chi^2 = 33$                    | <0,01  | Chi <sup>2</sup> |

Significant difference ( $p \leq 0.05$ ) are marked with an asterisk (\*). N=1031.

Table S2: Test results between customer characteristics and the opinion that tap water containing a very small amounts of non-natural substances is safe to drink as long as the amount falls within the legal standards.

|                                       | Tap water containing a very small amounts of non-natural substances is safe to drink |        | Test             |
|---------------------------------------|--------------------------------------------------------------------------------------|--------|------------------|
|                                       | U, rho or $\chi^2$                                                                   | p      |                  |
| Gender *                              | U = 140244                                                                           | <0,01  | Mann-Whitney     |
| Age                                   | rho = -0,03                                                                          | 0,40   | Spearman         |
| Level of education *                  | rho = 0,07                                                                           | <0,05  | Spearman         |
| Pregnant/children                     | U = 128131                                                                           | 0,17   | Mann-Whitney     |
| Pregnant/children under the age of 13 | U = 75422                                                                            | 0,80   | Mann-Whitney     |
| Chronical disease                     | U = 86812                                                                            | 0,53   | Mann-Whitney     |
| Customer perspective *                | $\chi^2 = 46$                                                                        | <0,001 | Chi <sup>2</sup> |
| Source                                | $\chi^2 = 17$                                                                        | 0,38   | Chi <sup>2</sup> |

Significant difference ( $p \leq 0.05$ ) are marked with an asterisk (\*). N=1006.
